# Supplementary material for: Managing Super Pests: Interplay between Pathogens and Symbionts Informs Biocontrol of Whiteflies
Source: MDPI journal article supplement (doi:10.3390/microorganisms12050887), 2024-04-28
Supplement: s1 [file s1]

TABLE S1 | Summary of high-throughput sequencing reads analysis, microbial community diversity richness (OTUs, 97%), sample coverage (Good's coverage), diversity index (Shannon, ACE, Shannon, Simpson), and estimated OTU richness (Sobs, Chao1) for community diversity analyses of 48 samples from whitefly of different development treatments.

| Sample               | Seq_num | Base_num | Mean_length | Alpha diversity estimators |       |       |         |         |          |
|----------------------|---------|----------|-------------|----------------------------|-------|-------|---------|---------|----------|
|                      |         |          |             | Sobs                       | ACE   | Chao  | Shannon | Simpson | coverage |
| N_C1                 | 39343   | 16311555 | 415         | 44                         | 62.56 | 59.00 | 1.04    | 0.4261  | 0.9996   |
| N_C2                 | 39499   | 16355728 | 414         | 48                         | 66.46 | 61.91 | 1.04    | 0.4363  | 0.9995   |
| N_C3                 | 36895   | 15239950 | 413         | 57                         | 77.12 | 76.00 | 1.07    | 0.4532  | 0.9994   |
| N_C4                 | 43538   | 18172823 | 417         | 47                         | 63.81 | 62.00 | 1.11    | 0.3820  | 0.9996   |
| N_C5                 | 46427   | 19177495 | 413         | 44                         | 60.35 | 57.13 | 0.98    | 0.4707  | 0.9997   |
| N_C6                 | 48339   | 20047154 | 415         | 56                         | 80.43 | 84.88 | 1.05    | 0.4205  | 0.9995   |
| N_LC <sub>20</sub> 1 | 45106   | 18735860 | 415         | 30                         | 50.47 | 39.17 | 1.17    | 0.3753  | 0.9997   |
| N_LC <sub>20</sub> 2 | 47677   | 19766506 | 415         | 33                         | 47.07 | 55.75 | 1.13    | 0.4002  | 0.9997   |
| N_LC <sub>20</sub> 3 | 47289   | 19710672 | 417         | 29                         | 51.13 | 38.17 | 1.12    | 0.3723  | 0.9998   |
| N_LC <sub>20</sub> 4 | 52161   | 21742589 | 417         | 27                         | 32.79 | 31.67 | 1.14    | 0.3624  | 0.9998   |
| N_LC <sub>20</sub> 5 | 48466   | 20114002 | 415         | 31                         | 45.36 | 44.20 | 1.07    | 0.4094  | 0.9997   |
| N_LC <sub>20</sub> 6 | 43787   | 18225334 | 416         | 26                         | 40.74 | 39.75 | 1.06    | 0.3997  | 0.9997   |

|                      |       |          |     |     |        |        |      |        |        |
|----------------------|-------|----------|-----|-----|--------|--------|------|--------|--------|
| N_LC <sub>30</sub> 1 | 46897 | 19413115 | 414 | 65  | 85.44  | 98.00  | 1.13 | 0.4187 | 0.9995 |
| N_LC <sub>30</sub> 2 | 48877 | 20188833 | 413 | 31  | 112.32 | 51.00  | 0.93 | 0.4769 | 0.9997 |
| N_LC <sub>30</sub> 3 | 48705 | 20088368 | 412 | 21  | 136.11 | 54.00  | 0.95 | 0.4891 | 0.9997 |
| N_LC <sub>30</sub> 4 | 45347 | 18734348 | 413 | 35  | 88.30  | 45.50  | 0.95 | 0.4713 | 0.9996 |
| N_LC <sub>30</sub> 5 | 72545 | 29957049 | 413 | 58  | 68.67  | 71.33  | 1.04 | 0.4558 | 0.9998 |
| N_LC <sub>30</sub> 6 | 47340 | 19581404 | 414 | 19  | 31.35  | 28.33  | 1.07 | 0.4307 | 0.9998 |
| N_LC <sub>50</sub> 1 | 46744 | 19399945 | 415 | 39  | 94.22  | 54.00  | 1.12 | 0.3935 | 0.9996 |
| N_LC <sub>50</sub> 2 | 44051 | 18117849 | 411 | 52  | 72.44  | 65.91  | 0.91 | 0.5294 | 0.9996 |
| N_LC <sub>50</sub> 3 | 48963 | 20200701 | 413 | 49  | 102.41 | 77.88  | 0.99 | 0.4801 | 0.9995 |
| N_LC <sub>50</sub> 4 | 49775 | 20640993 | 415 | 53  | 71.27  | 63.20  | 1.11 | 0.4062 | 0.9996 |
| N_LC <sub>50</sub> 5 | 50119 | 20773604 | 414 | 53  | 74.92  | 87.20  | 1.06 | 0.4240 | 0.9996 |
| N_LC <sub>50</sub> 6 | 51675 | 21408869 | 414 | 72  | 96.85  | 99.60  | 1.13 | 0.4048 | 0.9995 |
| V_C1                 | 41032 | 17169900 | 418 | 104 | 110.19 | 111.58 | 1.12 | 0.4032 | 0.9996 |
| V_C2                 | 39781 | 16736712 | 421 | 35  | 149.26 | 98.33  | 0.97 | 0.4382 | 0.9995 |
| V_C3                 | 45926 | 19070156 | 415 | 51  | 62.99  | 57.50  | 0.92 | 0.4534 | 0.9997 |
| V_C4                 | 40859 | 16997509 | 416 | 49  | 69.57  | 62.91  | 0.95 | 0.4394 | 0.9995 |
| V_C5                 | 45176 | 19032601 | 421 | 35  | 167.71 | 70.00  | 0.96 | 0.4346 | 0.9995 |

|                      |       |          |     |    |          |          |          |          |          |
|----------------------|-------|----------|-----|----|----------|----------|----------|----------|----------|
| V_C6                 | 42344 | 17686742 | 418 | 35 | 59.26    | 69.00    | 0.97     | 0.4191   | 0.9996   |
| V_LC <sub>20</sub> 1 | 44682 | 18769921 | 420 | 54 | 56.05    | 55.43    | 1.01     | 0.4428   | 0.9999   |
| V_LC <sub>20</sub> 2 | 45875 | 19090659 | 416 | 49 | 56.35    | 53.58    | 0.97     | 0.4351   | 0.9998   |
| V_LC <sub>20</sub> 3 | 51131 | 21225810 | 415 | 51 | 63.48387 | 64.125   | 1.006784 | 0.429875 | 0.999701 |
| V_LC <sub>20</sub> 4 | 52679 | 21716711 | 412 | 45 | 61.97465 | 57.36364 | 0.829962 | 0.54094  | 0.999654 |
| V_LC <sub>20</sub> 5 | 49432 | 20695671 | 419 | 66 | 73.58166 | 72.5     | 1.085446 | 0.398266 | 0.999729 |
| V_LC <sub>20</sub> 6 | 48872 | 20193803 | 413 | 44 | 56.8004  | 51.33333 | 0.937092 | 0.47917  | 0.999751 |
| V_LC <sub>30</sub> 1 | 42010 | 17443350 | 415 | 49 | 59.03536 | 54.5     | 1.025444 | 0.419469 | 0.999703 |
| V_LC <sub>30</sub> 2 | 42685 | 17659350 | 414 | 54 | 140.0637 | 77.21429 | 0.950345 | 0.46851  | 0.999341 |
| V_LC <sub>30</sub> 3 | 42067 | 17599937 | 418 | 70 | 81.39167 | 76.5     | 1.405774 | 0.362719 | 0.999651 |
| V_LC <sub>30</sub> 4 | 43763 | 18205706 | 416 | 45 | 61.42105 | 55.5     | 1.001857 | 0.4222   | 0.999646 |
| V_LC <sub>30</sub> 5 | 42453 | 17592302 | 414 | 56 | 65.55952 | 69       | 1.040646 | 0.429633 | 0.999663 |
| V_LC <sub>50</sub> 1 | 44034 | 18303121 | 416 | 63 | 78.53329 | 73.46154 | 1.050162 | 0.427452 | 0.999627 |
| V_LC <sub>50</sub> 2 | 46525 | 19300100 | 415 | 85 | 96.4536  | 94.24077 | 1.273767 | 0.3944   | 0.999647 |
| V_LC <sub>50</sub> 3 | 46192 | 19131357 | 414 | 63 | 79.53402 | 74.33333 | 0.616976 | 0.721626 | 0.999598 |
| V_LC <sub>50</sub> 4 | 42864 | 17482391 | 408 | 73 | 89.07528 | 82.5625  | 1.033261 | 0.42964  | 0.999574 |
| V_LC <sub>50</sub> 5 | 42822 | 17800621 | 416 | 84 | 94.54658 | 94.46154 | 1.187558 | 0.372654 | 0.999548 |

|                    |       |          |     |    |          |          |          |          |          |
|--------------------|-------|----------|-----|----|----------|----------|----------|----------|----------|
| V <sub>LC506</sub> | 38546 | 16123703 | 418 | 77 | 81.89486 | 86.16667 | 1.040357 | 0.468556 | 0.999747 |
| V <sub>LC507</sub> | 44063 | 18198023 | 413 | 79 | 91.28473 | 92.90909 | 1.131113 | 0.403297 | 0.999585 |
